# Supplementary material
Source: publisher figshare collection journal article supplement (https://adisjournals.figshare.com/ndownloader/files/36167205)
Supplement: Supplementary file 1 [file 36167205]

## Mavacamten: Adis Evaluation

### Key Points

- A cardiac myosin inhibitor developed by MyoKardia, Inc., a wholly owned subsidiary of Bristol Myers Squibb, for the treatment of HCM and diseases of diastolic dysfunction
- Received its first approval on 28 April 2022 in the USA
- Approved for use in the treatment of adults with symptomatic NYHA class II-III obstructive HCM to improve functional capacity and symptoms

### Summary

Mavacamten (Camzyos™) is an oral small-molecule cardiac myosin inhibitor developed by MyoKardia, Inc., a wholly owned subsidiary of Bristol Myers Squibb, for the treatment of hypertrophic cardiomyopathy (HCM) and diseases of diastolic dysfunction.

In April 2022, mavacamten was approved for use in the USA in the treatment of adults with symptomatic New York Heart Association (NYHA) class II-III obstructive HCM to improve functional capacity and symptoms.

This article summarizes the milestones in the development of mavacamten leading to this first approval for the treatment of adults with symptomatic NYHA class II-III obstructive HCM.

This summary represents the opinions of the author. For a full list of declarations, including funding and author disclosure statements, please see the full text online. © Springer Nature Switzerland AG 2022.
